# Supplementary material
Source: Research Square preprint supplement (doi:10.21203/rs.3.rs-9450293/v1)
Supplement: Supplementary file 1 [file 51690bb1faa23341805a5280.docx]

# Supplementary Tables S3 & S4

# Table S3 - Qualitative phase verbatim.

| **Panel** | **Round** | **Item (verbatim)** | **Item type** |
| --- | --- | --- | --- |
| Clinical oncologists | 1 | **Exames e periodicidade -** Quais exames você considera essenciais para o acompanhamento de pacientes com MUP? | Open text |
| Clinical oncologists | 1 | **Exames e periodicidade -** Como você determina a periodicidade e duração ideais do acompanhamento para cada perfil de risco? | Open text |
| Clinical oncologists | 1 | **Exames e periodicidade -**Qual seria a periodicidade considerada ideal para seguimento de pacientes de alto risco para metástase baseado no estadiamento TNM? | Open text |
| Clinical oncologists | 1 | **Ultrassonografia abdominal -** Qual é sua percepção sobre o papel da ultrassonografia abdominal no seguimento de pacientes com MUP? | Open text |
| Clinical oncologists | 1 | **Ultrassonografia abdominal -** Em sua experiência, a ultrassonografia é suficiente para monitoramento hepático ou deve ser complementada por outros exames? | Open text |
| Clinical oncologists | 1 | **Enzimas Hepáticas (ALT, AST, GGT)** - Você utiliza marcadores bioquímicos hepáticos como parte do monitoramento de pacientes com MUP? | Open text |
| Clinical oncologists | 1 | **Enzimas Hepáticas (ALT, AST, GGT)** - Qual a relevância desses exames em comparação com exames de imagem na detecção precoce de metástases? | Open text |
| Clinical oncologists | 1 | **Desidrogenase Lática (LDH) -**Em sua experiência, a LDH é um marcador confiável para prognóstico em pacientes com MUP? | Open text |
| Clinical oncologists | 1 | **Desidrogenase Lática (LDH) -**Você acredita que sua utilização deveria ser padronizada no seguimento desses pacientes? | Open text |
| Clinical oncologists | 1 | **Exames de imagem -**Na sua prática clínica, qual(ais) exame(s) de imagem você solicita para pacientes com MUP (favor citar nome/tipo de exame, critérios para solicitação, e ordem cronológica dos exames) | Open text |
| Ocular oncologists | 1 | Tamanho e localização do tumor - Em sua prática clínica, como o tamanho e a localização do tumor influenciam a estratificação de risco para a doença metastática e a decisão terapêutica em pacientes com MUP? | Open text |
| Ocular oncologists | 1 | Tamanho e localização do tumor - Existem características específicas que fazem um tumor de mesmo tamanho apresentar riscos diferentes em pacientes com MUP? | Open text |
| Ocular oncologists | 1 | Utilização de TNM - Em sua prática clínica, você utiliza TNM para classificação tumoral em pacientes com MUP? | Open text |
| Ocular oncologists | 1 | Utilização de TNM - Qual é a sua opinião sobre a relevância da utilização de TNM para a estratificação de risco para a doença metastática e a decisão terapêutica em pacientes com MUP? | Open text |
| Ocular oncologists | 1 | Extensão extrascleral -  Você considera a invasão extrascleral um fator determinante para o prognóstico em pacientes com MUP? Em quais situações isso altera sua abordagem? | Open text |
| Ocular oncologists | 1 | Extensão extrascleral -  Há desafios na identificação da invasão extrascleral antes do tratamento? | Open text |
| Ocular oncologists | 1 | Monossomia do cromossomo 3 - Na sua prática clínica, você realiza a avaliação de monossomia do cromossomo 3 em pacientes com MUP? | Open text |
| Ocular oncologists | 1 | Monossomia do cromossomo 3 - Em sua experiência, como a presença da monossomia do cromossomo 3 influencia a conduta clínica? | Open text |
| Ocular oncologists | 1 | Monossomia do cromossomo 3 - Qual é a sua percepção sobre a importância e aplicação desse achado para a avaliação de risco de doença metastática? | Open text |
| Ocular oncologists | 1 | Amplificação do cromossomo 8q - Na sua prática clínica, você realiza a avaliação da amplificação de cromossomo 8q em pacientes com MUP? | Open text |
| Ocular oncologists | 1 | Amplificação do cromossomo 8q - Em sua experiência, como a amplificação de cromossomo 8q influencia a conduta clínica? | Open text |
| Ocular oncologists | 1 | Amplificação do cromossomo 8q - Qual é a sua percepção sobre a importância e aplicação desse achado para a avaliação de risco de doença metastática? | Open text |
| Ocular oncologists | 1 | Amplificação do cromossomo 8q - Na sua percepção, há consenso sobre a importância e aplicação desse achado para a avaliação de risco de doença metastática? | Open text |
| Ocular oncologists | 1 | Trissomia do cromossomo 6 - Na sua prática clínica, você realiza a avaliação da trissomia do cromossomo 6 em pacientes com MUP? | Open text |
| Ocular oncologists | 1 | Trissomia do cromossomo 6 - Em sua experiência, como a trissomia do cromossomo 6 influencia a conduta clínica em pacientes com MUP? | Open text |
| Ocular oncologists | 1 | Trissomia do cromossomo 6 - Qual é a sua percepção sobre a importância e aplicação desse achado para a avaliação de risco de doença metastática? | Open text |
| Ocular oncologists | 1 | Trissomia do cromossomo 6 - Na sua percepção, há consenso sobre a importância e aplicação desse achado para a avaliação de risco de doença metastática? | Open text |
| Ocular oncologists | 1 | Mutação BAP1 - Na sua prática clínica, você realiza a avaliação de mutação em BAP1 em pacientes com MUP? | Open text |
| Ocular oncologists | 1 | Mutação BAP1 - Em sua experiência, como a mutação em BAP1 influencia a conduta clínica? | Open text |
| Ocular oncologists | 1 | Mutação BAP1 - Qual é a sua percepção sobre a importância e aplicação desse achado para a avaliação de risco de doença metastática? | Open text |
| Ocular oncologists | 1 | Mutação BAP1 - Na sua percepção, há consenso sobre a importância e aplicação desse achado para a avaliação de risco de doença metastática? | Open text |
| Ocular oncologists | 1 | Quais critérios você utiliza para decidir entre braquiterapia e enucleação em pacientes com MUP? | Open text |
| Ocular oncologists | 1 | Se você não possui acesso a braquiterapia, caso possuísse, como sua conduta clínica seria alterada? | Open text |
| Ocular oncologists | 1 | Na sua percepção, existem diferenças de prognóstico entre ambas as abordagens (braquiterapia *versus* enucleação)? | Open text |
| Ocular oncologists | 1 | Como a escolha/decisão do paciente frente às diferentes opções de tratamento pode impactar no prognóstico? | Open text |
| Ocular oncologists | 1 | Em sua experiência, a intervenção precoce pode melhorar o prognóstico do paciente com MUP? | Open text |
| Ocular oncologists | 1 | Em sua experiência, o que define uma intervenção precoce em um paciente com suspeita de MUP? | Open text |
| Ocular oncologists | 1 | Quais intervenções precoces podem melhorar o prognóstico de pacientes com MUP? | Open text |
| Radiotherapists | 1 | Em sua prática, quais características clínicas e tumorais você considera determinantes para optar por diferentes opções de tratamento (braquiterapia, radioterapia externa) como tratamento inicial? | Open text |
| Radiotherapists | 1 | Quais critérios técnicos ou anatômicos você usa para definir o tipo de radiação (ex: Rutênio-106 vs Iodo-125)? A escolha impacta o risco de recidiva local? | Open text |
| Radiotherapists | 1 | Você costuma monitorar a resposta ao tratamento com base em redução de espessura tumoral ou outras características clínicas? Em que momento pós-tratamento considera essa resposta mais confiável? | Open text |
| Radiotherapists | 1 | Na sua experiência, quais complicações locais (ex: necrose, perfuração, inflamação persistente) estão associadas a pior prognóstico após radioterapia? | Open text |
| Radiotherapists | 1 | Você costuma reirradiar pacientes em caso de recidiva local? Em que situações considera isso apropriado? | Open text |

# Table S4 - Quantitative phase verbatim and results by item and round.

| **Panel** | **Round** | **Item (verbatim)** | **Item type** | **Consensus threshold** | **N** | **Agree % (4-5)** | **Disagree % (1-2)** | **Top option** | **Top option %** | **Median** | **IQR** | **Consensus reached** | **Consensus %** |
| --- | --- | --- | --- | --- | --- | --- | --- | --- | --- | --- | --- | --- | --- |
| Clinical oncologists | Round 1 | A ressonância magnética abdominal deve ser considerada como o principal exame de imagem para vigilância de metástases hepáticas em pacientes com MUP. *(assinale a opção que melhor representa sua concordância com essa afirmação)* | Likert-5 | ≥70% | 17 | 82.4 | 5.9 |  |  | 5.0 | 1.0 | Yes (agreement) | 82.4 |
| Clinical oncologists | Round 1 | Na impossibilidade de realizar ressonância magnética, a tomografia com contraste é uma alternativa aceitável para vigilância hepática em pacientes com MUP. (assinale a opção que melhor representa sua concordância com essa afirmação) | Likert-5 | ≥70% | 17 | 88.2 | 11.8 |  |  | 5.0 | 0.0 | Yes (agreement) | 88.2 |
| Clinical oncologists | Round 1 | A ultrassonografia deve ser utilizada com cautela como**método único** de rastreio hepático no MUP. *(assinale a opção que melhor representa sua concordância com essa afirmação)* | Likert-5 | ≥70% | 17 | 76.5 | 17.6 |  |  | 4.0 | 1.0 | Yes (agreement) | 76.5 |
| Clinical oncologists | Round 1 | O uso de raio-X de tórax no seguimento de pacientes com MUP deve ser evitado como método de **rotina**. *(assinale a opção que melhor representa sua concordância com essa afirmação)* | Likert-5 | ≥70% | 17 | 82.4 | 5.9 |  |  | 4.0 | 1.0 | Yes (agreement) | 82.4 |
| Clinical oncologists | Round 1 | A periodicidade dos exames de vigilância hepática deve ser adaptada ao risco individual do paciente para metástase. *(assinale a opção que melhor representa sua concordância com essa afirmação)* | Likert-5 | ≥70% | 17 | 100.0 | 0.0 |  |  | 5.0 | 0.0 | Yes (agreement) | 100.0 |
| Clinical oncologists | Round 1 | Nos dois primeiros anos após o diagnóstico, pacientes de**alto risco** para metástase devem ser acompanhados com exames de imagem com qual frequência, em sua opinião? *(assinale a opção que melhor representa sua concordância com essa afirmação)* | Categorical | ≥70% | 17 |  |  | A cada 3 meses | 88.2 |  |  | Yes | 88.2 |
| Clinical oncologists | Round 1 | Após os dois primeiros anos, pacientes de **alto risco** para metástase devem ser acompanhados com exames de imagem com qual frequência, em sua opinião? *(assinale a opção que melhor representa sua concordância com essa afirmação)* | Categorical | ≥70% | 17 |  |  | A cada 6 meses | 82.4 |  |  | Yes | 82.4 |
| Clinical oncologists | Round 1 | Nos dois primeiros anos após o diagnóstico, pacientes de**risco intermediário** para metástase devem ser acompanhados com exames de imagem com qual frequência, em sua opinião? *(assinale a opção que melhor representa sua concordância com essa afirmação)* | Categorical | ≥70% | 17 |  |  | A cada 6 meses | 76.5 |  |  | Yes | 76.5 |
| Clinical oncologists | Round 1 | Após os dois primeiros anos, pacientes de **risco intermediário** para metástase devem ser acompanhados com exames de imagem com qual frequência, em sua opinião? *(assinale a opção que melhor representa sua concordância com essa afirmação)* | Categorical | ≥70% | 17 |  |  | A cada 6 meses | 52.9 |  |  | No | 52.9 |
| Clinical oncologists | Round 1 | Nos dois primeiros anos após o diagnóstico, pacientes de**baixo risco** para metástase devem ser acompanhados com exames de imagem com qual frequência, em sua opinião? *(assinale a opção que melhor representa sua concordância com essa afirmação)* | Categorical | ≥70% | 17 |  |  | A cada 6 meses | 52.9 |  |  | No | 52.9 |
| Clinical oncologists | Round 1 | Após os dois primeiros anos, pacientes de **baixo risco** para metástase devem ser acompanhados com exames de imagem com qual frequência, em sua opinião? *(assinale a opção que melhor representa sua concordância com essa afirmação)* | Categorical | ≥70% | 17 |  |  | A cada 12 meses | 58.8 |  |  | No | 58.8 |
| Clinical oncologists | Round 1 | Exames laboratoriais de função hepática (AST, ALT, bilirrubinas) devem ser solicitados como complemento ao rastreio por imagem no acompanhamento de pacientes com MUP. *(assinale a opção que melhor representa sua concordância com essa afirmação)* | Likert-5 | ≥70% | 17 | 58.8 | 11.8 |  |  | 4.0 | 2.0 | No | 58.8 |
| Clinical oncologists | Round 1 | O LDH deve ser considerado um marcador complementar no acompanhamento de pacientes com MUP. *(assinale a opção que melhor representa sua concordância com essa afirmação)* | Likert-5 | ≥70% | 17 | 70.6 | 5.9 |  |  | 4.0 | 1.0 | Yes (agreement) | 70.6 |
| Clinical oncologists | Round 1 | A frequência dos exames laboratoriais complementares deve acompanhar a mesma periodicidade dos exames de imagem para cada faixa de risco em pacientes com MUP. *(assinale a opção que melhor representa sua concordância com essa afirmação)* | Likert-5 | ≥70% | 17 | 82.4 | 5.9 |  |  | 5.0 | 1.0 | Yes (agreement) | 82.4 |
| Clinical oncologists | Round 1 | Quando os fatores de risco disponíveis apontam para níveis diferentes de risco para metástase (por exemplo: tumor pequeno com mutações genéticas de alto risco), qual deve ser o princípio orientador para a definição do grau de risco para doença metastática? *(assinale a opção que melhor representa sua concordância com essa afirmação)* | Categorical | ≥70% | 17 |  |  | A classificação deve seguir o fator com maior risco entre os disponíveis. | 88.2 |  |  | Yes | 88.2 |
| Clinical oncologists | Round 1 | Em minha prática, as decisões clínicas de seguimento em MUP são baseadas principalmente na experiência individual, com menor ênfase em protocolos formais. *(assinale a opção que melhor representa sua concordância com essa afirmação)* | Likert-5 | ≥70% | 17 | 11.8 | 88.2 |  |  | 2.0 | 1.0 | Yes (disagreement) | 88.2 |
| Ocular oncologists | Round 1 | A presença de monossomia do cromossomo 3 ou mutação em BAP1 deve ser considerada isoladamente suficiente para classificar o paciente com MUP como de alto risco para metástase. *(assinale a opção que melhor representa sua concordância com essa afirmação)* | Likert-5 | ≥70% | 14 | 92.9 | 7.1 |  |  | 4.5 | 1.0 | Yes (agreement) | 92.9 |
| Ocular oncologists | Round 1 | A presença de ganho no cromossomo 8q deve ser considerada fator de pior prognóstico em pacientes com MUP. *(assinale a opção que melhor representa sua concordância com essa afirmação)* | Likert-5 | ≥70% | 14 | 78.6 | 14.3 |  |  | 4.0 | 1.0 | Yes (agreement) | 78.6 |
| Ocular oncologists | Round 1 | A presença de fatores como extensão extrascleral, monossomia do cromossomo 3 ou mutação em BAP1 deve ser considerada determinante para o prognóstico de pacientes com MUP. *(assinale a opção que melhor representa sua concordância com essa afirmação)* | Likert-5 | ≥70% | 14 | 100.0 | 0.0 |  |  | 5.0 | 0.0 | Yes (agreement) | 100.0 |
| Ocular oncologists | Round 1 | Em casos em que fatores clínicos, genéticos e anatômicos indicam níveis diferentes de risco para metástase (ex: tumor pequeno com mutação BAP1), qual deve ser o princípio utilizado para definir o grau de risco. *(assinale a opção que melhor representa sua concordância com essa afirmação)* | Categorical | ≥70% | 14 |  |  | A classificação deve seguir o fator de maior risco (genético ou anatômico). | 57.1 |  |  | No | 57.1 |
| Ocular oncologists | Round 1 | A presença de quais dos fatores abaixo deve, isoladamente, classificar um paciente com MUP como de alto risco para doença metastática? *(assinale todas as opções que representam sua concordância)* | Categorical | ≥70% | 14 |  |  | Monossomia do cromossomo 3 isoladamente ;Mutação em BAP1 isoladamente; Extensão extrascleral isoladamente; Tumor com espessura ≥10 mm isoladamente; | 21.4 |  |  | No | 21.4 |
| Ocular oncologists | Round 1 | A falta de acesso a exames genéticos como BAP1 e monossomia do 3 compromete a estratificação de risco para metástase e a tomada de decisão clínica em pacientes com MUP. *(assinale a opção que melhor representa sua concordância com essa afirmação)* | Likert-5 | ≥70% | 14 | 85.7 | 14.3 |  |  | 4.0 | 1.0 | Yes (agreement) | 85.7 |
| Ocular oncologists | Round 1 | Há limitações relevantes na acurácia dos métodos disponíveis para detectar invasão extrascleral antes do tratamento. *(assinale a opção que melhor representa sua concordância com essa afirmação)* | Likert-5 | ≥70% | 14 | 64.3 | 35.7 |  |  | 4.0 | 2.0 | No | 64.3 |
| Ocular oncologists | Round 1 | A intervenção precoce em pequenos melanomas uveais pode impactar positivamente o prognóstico de pacientes com MUP. *(assinale a opção que melhor representa sua concordância com essa afirmação)* | Likert-5 | ≥70% | 14 | 100.0 | 0.0 |  |  | 5.0 | 0.0 | Yes (agreement) | 100.0 |
| Ocular oncologists | Round 1 | Tumores com espessura ≥10 mm devem ser preferencialmente tratados com enucleação, em vez de braquiterapia. *(assinale a opção que melhor representa sua concordância com essa afirmação)* | Likert-5 | ≥70% | 14 | 78.6 | 21.4 |  |  | 5.0 | 1.0 | Yes (agreement) | 78.6 |
| Ocular oncologists | Round 1 | Tumores localizados no corpo ciliar devem ser considerados preferencialmente para enucleação devido à menor taxa de controle local com braquiterapia. *(assinale a opção que melhor representa sua concordância com essa afirmação)* | Likert-5 | ≥70% | 14 | 14.3 | 85.7 |  |  | 1.0 | 1.0 | Yes (disagreement) | 85.7 |
| Ocular oncologists | Round 1 | A escolha terapêutica feita pelo paciente com MUP entre opções viáveis pode impactar o prognóstico oncológico. *(assinale a opção que melhor representa sua concordância com essa afirmação)* | Likert-5 | ≥70% | 14 | 50.0 | 42.9 |  |  | 3.5 | 3.0 | No | 50.0 |
| Ocular oncologists | Round 1 | O seguimento ocular de pacientes com MUP em minha prática é baseado majoritariamente na minha experiência individual do que em protocolos formais. *(assinale a opção que melhor representa sua concordância com essa afirmação)* | Likert-5 | ≥70% | 14 | 42.9 | 57.1 |  |  | 2.0 | 2.0 | No | 57.1 |
| Radiotherapiosts | Round 1 (descriptive) | Tumores com espessura ≥10 mm apresentam maior risco de falha local após braquiterapia. *(assinale a opção que melhor representa sua concordância com essa afirmação)* | Likert-5 | ≥70% | 2 | 100.0 | 0.0 |  |  | 4.5 | 0.5 | Yes (agreement) | 100.0 |
| Radiotherapiosts | Round 1 (descriptive) | Tumores localizados no corpo ciliar apresentam maior risco de recidiva ou controle incompleto após braquiterapia. *(assinale a opção que melhor representa sua concordância com essa afirmação)* | Likert-5 | ≥70% | 2 | 50.0 | 50.0 |  |  | 3.0 | 1.0 | No | 50.0 |
| Radiotherapiosts | Round 1 (descriptive) | A margem de segurança utilizada na braquiterapia pode influenciar o risco de recidiva local. *(assinale a opção que melhor representa sua concordância com essa afirmação)* | Likert-5 | ≥70% | 2 | 100.0 | 0.0 |  |  | 4.5 | 0.5 | Yes (agreement) | 100.0 |
| Radiotherapiosts | Round 1 (descriptive) | A falha do controle local após braquiterapia aumenta o risco de metástase sistêmica. *(assinale a opção que melhor representa sua concordância com essa afirmação)* | Likert-5 | ≥70% | 2 | 100.0 | 0.0 |  |  | 5.0 | 0.0 | Yes (agreement) | 100.0 |
| Radiotherapiosts | Round 1 (descriptive) | A falha do controle local (recidiva ou persistência tumoral) após braquiterapia deve, por si só, reclassificar o paciente com MUP como de alto risco para doença metastática. *(assinale a opção que melhor representa sua concordância com essa afirmação)* | Likert-5 | ≥70% | 2 | 50.0 | 50.0 |  |  | 3.0 | 1.0 | No | 50.0 |
| Radiotherapiosts | Round 1 (descriptive) | A braquiterapia com rutênio é a principal opção terapêutica disponível para o tratamento do MUP no Brasil. *(assinale a opção que melhor representa sua concordância com essa afirmação)* | Likert-5 | ≥70% | 2 | 0.0 | 50.0 |  |  | 2.0 | 1.0 | No | 50.0 |
| Radiotherapiosts | Round 1 (descriptive) | O iodo-125 não está disponível na maioria dos centros para tratamento de MUP no Brasil. *(assinale a opção que melhor representa sua concordância com essa afirmação)* | Likert-5 | ≥70% | 2 | 100.0 | 0.0 |  |  | 4.5 | 0.5 | Yes (agreement) | 100.0 |
| Radiotherapiosts | Round 1 (descriptive) | A decisão de realizar braquiterapia com rutênio pode limitar a margem terapêutica em casos mais espessos (>7 mm). *(assinale a opção que melhor representa sua concordância com essa afirmação)* | Likert-5 | ≥70% | 2 | 100.0 | 0.0 |  |  | 5.0 | 0.0 | Yes (agreement) | 100.0 |
| Radiotherapiosts | Round 1 (descriptive) | A escolha do isótopo (rutênio ou iodo-125) pode impactar o controle local e o risco de recidiva. *(assinale a opção que melhor representa sua concordância com essa afirmação)* | Likert-5 | ≥70% | 2 | 100.0 | 0.0 |  |  | 4.5 | 0.5 | Yes (agreement) | 100.0 |
| Radiotherapiosts | Round 1 (descriptive) | Quando disponíveis rutênio e iodo-125, a escolha do isótopo deve ser baseada na espessura tumoral. *(assinale a opção que melhor representa sua concordância com essa afirmação)* | Likert-5 | ≥70% | 2 | 100.0 | 0.0 |  |  | 4.5 | 0.5 | Yes (agreement) | 100.0 |
| Radiotherapiosts | Round 1 (descriptive) | A ausência de braquiterapia disponível no centro inviabiliza a preservação do globo ocular na maior parte dos casos. *(assinale a opção que melhor representa sua concordância com essa afirmação)* | Likert-5 | ≥70% | 2 | 50.0 | 50.0 |  |  | 2.5 | 1.5 | No | 50.0 |
| Radiotherapiosts | Round 1 (descriptive) | Pacientes com características anatômicas desfavoráveis (ex: corpo ciliar, >10 mm) deveriam ter seguimento clínico e radiológico mais intensivo. *(assinale a opção que melhor representa sua concordância com essa afirmação)* | Likert-5 | ≥70% | 2 | 100.0 | 0.0 |  |  | 4.5 | 0.5 | Yes (agreement) | 100.0 |
| Clinical oncologists | Round 2 (re-iteration) | Para cada alteração genética abaixo, indique se ela é **suficiente por si só** para classificar um paciente com MUP em diferentes graus de risco para doença metastática.   - Monossomia do cromossomo 3 - Mutação em BAP1 | Categorical | ≥70% | 19 |  |  | - Alto Risco - Alto Risco | 84.2  78.9 |  |  | Yes  Yes | 84.2  78.9 |
| Clinical oncologists | Round 2 (re-iteration) | Após os 2 primeiros anos do diagnóstico de MUP, pacientes de risco intermediário para metástase devem ser acompanhados com exames de imagem com qual frequência, em sua opinião? (assinale a opção que melhor representa sua concordância com essa afirmação). | Categorical | ≥70% | 19 |  |  | 6 meses | 100.0 |  |  | Yes | 100.0 |
| Clinical oncologists | Round 2 (re-iteration) | Em relação à pergunta anterior, caso a maioria dos respondedores escolha a alternativa à sua preferência, você a consideraria como padrão aceitável? | Binary(select) | ≥70% | 19 | 100.0 | 0.0 | Sim | 100.0 | 1.0 | 0.0 | Yes (selected) | 100.0 |
| Clinical oncologists | Round 2 (re-iteration) | Nos dois primeiros anos após o diagnóstico de MUP, pacientes de risco baixo para metástase devem ser acompanhados com exames de imagem com qual frequência, em sua opinião? (assinale a opção que melhor representa sua concordância com essa afirmação). | Categorical | ≥70% | 19 |  |  | 6 meses | 78.9 |  |  | Yes | 78.9 |
| Clinical oncologists | Round 2 (re-iteration) | Em relação à pergunta anterior, caso a maioria dos respondedores escolha a alternativa à sua preferência, você a consideraria como padrão aceitável? | Binary(select) | ≥70% | 19 | 94.7 | 5.3 | Sim | 94.7 | 1.0 | 0.0 | Yes (selected) | 94.7 |
| Clinical oncologists | Round 2 (re-iteration) | Após os 2 primeiros anos do diagnóstico de MUP, pacientes de risco baixo para metástase devem ser acompanhados com exames de imagem com qual frequência, em sua opinião? (assinale a opção que melhor representa sua concordância com essa afirmação) | Categorical | ≥70% | 19 |  |  | 6 meses | 94.7 |  |  | Yes | 94.7 |
| Clinical oncologists | Round 2 (re-iteration) | Em relação à pergunta anterior, caso a maioria dos respondedores escolha a alternativa à sua preferência, você a consideraria como padrão aceitável? | Binary(select) | ≥70% | 19 | 94.7 | 5.3 | Sim | 94.7 | 1.0 | 0.0 | Yes | 94.7 |
| Clinical oncologists | Round 2 (re-iteration) | Exames laboratoriais de função hepática (AST, ALT, bilirrubinas) devem ser solicitados como complemento ao rastreio por imagem no acompanhamento de pacientes com MUP com qual frequência? *(assinale a opção que melhor representa sua concordância com essa afirmação).* | Categorical | ≥70% | 19 |  |  | Seguir a mesma periodicidade dos exames de imagem para cada faixa de risco | 78.9 |  |  | Yes | 78.9 |
| Clinical oncologists | Round 2 (re-iteration) | Em relação à pergunta anterior, caso a maioria dos respondedores escolha a alternativa à sua preferência, você a consideraria como padrão aceitável? | Binary(select) | ≥70% | 19 | 100.0 | 0.0 | Sim | 100.0 | 1.0 | 0.0 | Yes | 100.0 |
| Ocular oncologists | Round 2 (re-iteration) | Protocolos formais são o **principal guia** dos parâmetros de seguimento ocular de pacientes com MUP**na sua prática**(frequência de acompanhamento, exames, etc) | Categorical | ≥70% | 12 |  |  | Concordo | 83.3 |  |  | Yes | 83.3 |
| Ocular oncologists | Round 2 (re-iteration) | Para a decisão terapêutica inicial em MUP, a confirmação de extensão escleral é: | Categorical | ≥70% | 12 |  |  | Obrigatória (determina minha conduta) | 50.0 |  |  | No | 50.0 |
| Ocular oncologists | Round 2 (re-iteration) | Os métodos de imagem disponíveis na sua prática são suficientes para confirmar/descartar invasão escleral na maioria dos casos em pacientes com MUP | Binary(select) | ≥70% | 12 | 83.3 | 16.7 | Sim | 83.3 | 1.0 | 0.0 | Yes | 83.3 |
| Ocular oncologists | Round 2 (re-iteration) | Na sua opinião, como regra geral, qual é o peso da presença extensão escleral na classificação de risco para doença metastática em pacientes com MUP? | Categorical | ≥70% | 12 |  |  | Alto | 58.3 |  |  | No | 58.3 |
| Ocular oncologists | Round 2 (re-iteration) | Na sua opinião, como regra geral, qual é o peso da presença de tumores ≥10 mm (espessura) na classificação de risco para doença metastática em pacientes com MUP? | Categorical | ≥70% | 12 |  |  | Alto | 83.3 |  |  | Yes | 83.3 |
| Ocular oncologists | Round 2 (re-iteration) | Na sua opinião, qual é o peso da presença da doença no corpo ciliar na classificação de risco para doença metastática em pacientes com MUP? | Categorical | ≥70% | 12 |  |  | Médio | 58.3 |  |  | No | 58.3 |
| Ocular oncologists | Round 2 (re-iteration) | Na sua opinião, quando dois ou mais fatores oculares de risco estão presentes em pacientes com MUP (p. ex., extensão escleral, tumor com espessura ≥10 mm, corpo ciliar etc.), a regra de combinação para determinação do risco para doença metastática deve ser: | Categorical | ≥70% | 12 |  |  | Usar o pior nível entre os fatores presentes | 58.3 |  |  | No | 58.3 |
