# Supplementary material
Source: Research Square preprint supplement (doi:10.21203/rs.3.rs-9450293/v1)
Supplement: Supplementary file 2 [file b6e017ff3ce14645fefa4bef.docx]

**Supplementary figure S2. Experts participation diagram**

Invitations to take part sent to those who participated on the Qualitative Phase.

**Quantitative phase**

- 17 clinical oncologists
- 14 ocular oncologists
- 2 radiotherapists

Invitations to take part sent to those with confirmed interest.

**Qualitative phase**

- 19 clinical oncologists
- 14 ocular oncologists
- 3 radiotherapists

**58 experts approached**

- 30 clinical oncologists
- 21 ocular oncologists
- 5 radiotherapists
- 2 radiologists
