# Supplementary material
Source: Research Square preprint supplement (doi:10.21203/rs.3.rs-9450293/v1)
Supplement: Supplementary file 3 [file fb54958f40b4990e4a8b3808.docx]

**Supplementary Appendix S1. Members of the PRIME Delphi Study Group**

| Name | Degree(s) | Specialty | Institution | Country |
| --- | --- | --- | --- | --- |
| Andreia Cristina de Melo | MD, PhD | Clinical Oncologist | Instituto Nacional do Câncer | Brazil |
| Brunella Maria Pavan Taffner | MD, PhD | Ocular Oncologist | Universidade Federal do Espírito Santo | Brazil |
| Bruno Saravia Rocha | MD | Ocular Oncologist | Visum Oftalmologia | Brazil |
| Carlos Eduardo de Souza | MD, PhD | Ocular Oncologist | Universidade Federal de São Paulo | Brazil |
| Cicero Luiz Martins | MD | Clinical Oncologist | Instituto Nacional do Câncer | Brazil |
| Danilo Nascimento Salviano Gomes | ND | Radiotherapist | Hospital das Clínicas de Ribeirão Preto | Brazil |
| Diego Vinícius Gonçalves Santana | MD | Clinical Oncologist | Honcord | Brazil |
| Diogo de Brito Sales | MD | Clinical Oncologist | Hospital Israelita Albert Einstein | Brazil |
| Evandro Lucena | MD | Ocular Oncologist | Instituto Nacional do Câncer | Brazil |
| Fabiane Kellem Oliveira dos Santos Ceasário | MD | Clinical Oncologist | Rede D`Or | Brazil |
| Fabio Borges Nogueira | MD | Ocular Oncologist | Centro Oftalmológico Minas Gerais | Brazil |
| Felipe Baccega | MD | Ocular Oncologist | Hospital das Clínicas da Faculdade de Medicina da USP | Brazil |
| Felipe Erlich | MD, Msc | Radiotherapist | Rede D`Or | Brazil |
| Fernanda Menezes Tufi Hassan | MD | Clinical Oncologist | Hospital de Amor de Barretos | Brazil |
| Flávio Silva Brandão | MD | Clinical Oncologist | Oncoclínicas | Brazil |
| Gustavo Schvartsman | MD, PhD | Clinical Oncologist | Hospital Israelita Albert Einstein | Brazil |
| Icaro Thiago de Carvalho | MD | Radiotherapist | Hospital Israelita Albert Einstein | Brazil |
| Isabella Favato Barcelos | MD | Clinical Oncologist | Oncoclínicas | Brazil |
| Iuri Amorim de Santana | MD | Clinical Oncologist | Oncoclínicas | Brazil |
| Joana Spaggiari Marra | MD | Clinical Oncologist | Centro de Tratamento Oncológico | Brazil |
| Leticia Dourado Alves | MD | Ocular Oncologist | --- | Brazil |
| Luiz Fernando Teixeira | MD, PhD | Ocular Oncologist | Universidade Federal de São Paulo | Brazil |
| Marcelo Krieger Maestri | MD | Ocular Oncologist | Hospital de Clínicas de Porto Alegre, Universidade Federal do Rio Grande do Sul | Brazil |
| Márcio Augusto Nogueira Costa | MD, PhD | Ocular Oncologist | Universidade Federal de São Paulo | Brazil |
| Matheus de Aquino Moreira Guimaraes | MD | Clinical Oncologist | Hospital das Clínicas de Ribeirão Preto | Brazil |
| Mirella Nardo | MD | Clinical Oncologist | Rede D`Or | Brazil |
| Patricia Correa | MD | Ocular Oncologist | Hospital Universitário dos servidores do estado do Rio de Janeiro | Brazil |
| Rafael Aron Schmerling | MD | Clinical Oncologist | Rede Américas | Brazil |
| rodrigo kraft rovere | MD | Clinical Oncologist | Oncoclinicas | Brazil |
| Rodrigo Munhoz | MD, PhD, FASCO | Clinical Oncologist | Hospital Sírio Libanês | Brazil |
| Rodrigo Perez Pereira | MD, PhD | Clinical Oncologist | Hospital de Clínicas de Porto Alegre | Brazil |
| Rodrigo Ughini Villarroel | MD | Clinical Oncologist | Hospital São Vicente de Paulo | Brazil |
| Tomás Teixeira-Pinto | MD | Ocular Oncologist | Hospital de Câncer de Barretos | Brazil |
| Veridiana Pires Camargo | MD | Clinical Oncologist | Beneficência Portuguesa de São Paulo | Brazil |
| Virginia laura lucas torres | MD | Ocular Oncologist | Universidade Federal de Pernambuco | Brazil |
